# Supplementary material
Source: MDPI journal article supplement (https://www.mdpi.com/2311-7524/9/9/953)
Supplement: s1 [file s1]

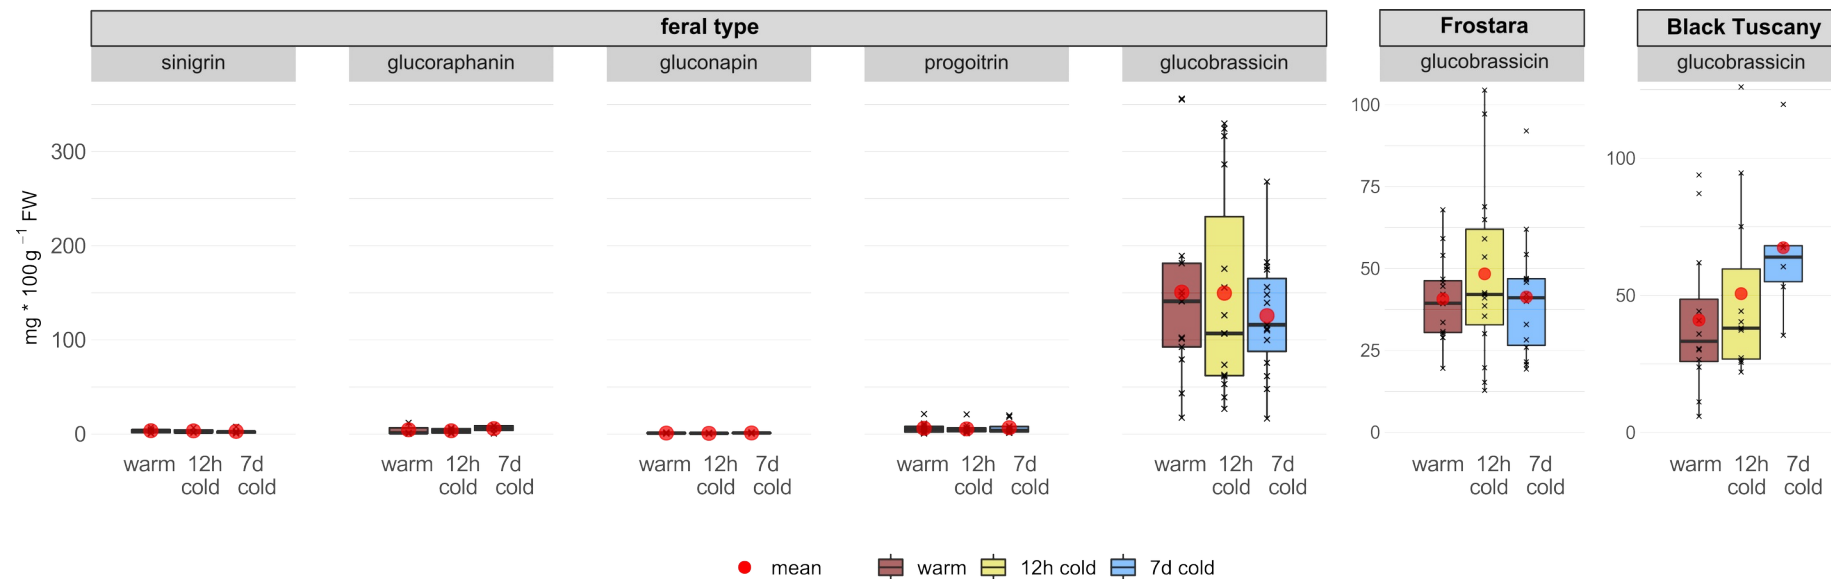

**Figure S3.** Glucosinolate levels (mg 100 g<sup>-1</sup> FW) of feral-type “Helgoländer”, curly kale “Frostara”, and Lacinato kale “Black Tuscany”, determined in control plants cultivated at constant warm temperatures. Samples were taken at the same time-points as in the main experiment (“warm” (day 0), “12h”, and “7d”). Individual data points (crosses) as well as mean and median are shown. In “Frostara” and “Black Tuscany”, only glucobrassicin was found – possible reasons are discussed in the text. Note the different scales.
