# Supplementary material
Source: MDPI journal article supplement (https://www.mdpi.com/2311-7524/9/9/953)
Supplement: s1 [file s1]

Archive with 5 entries (5 files):
- Supplementary Figure S1.pdf
- Supplementary Figure S2.pdf
- Supplementary Figure S3.pdf
- Supplementary File S1.txt
- Supplementary Tables S1-S6.pdf
