# Supplementary material
Source: MDPI journal article supplement (https://www.mdpi.com/2311-7524/9/9/953)
Supplement: s1 [file s1 › Supplementary Figure S1.pdf]

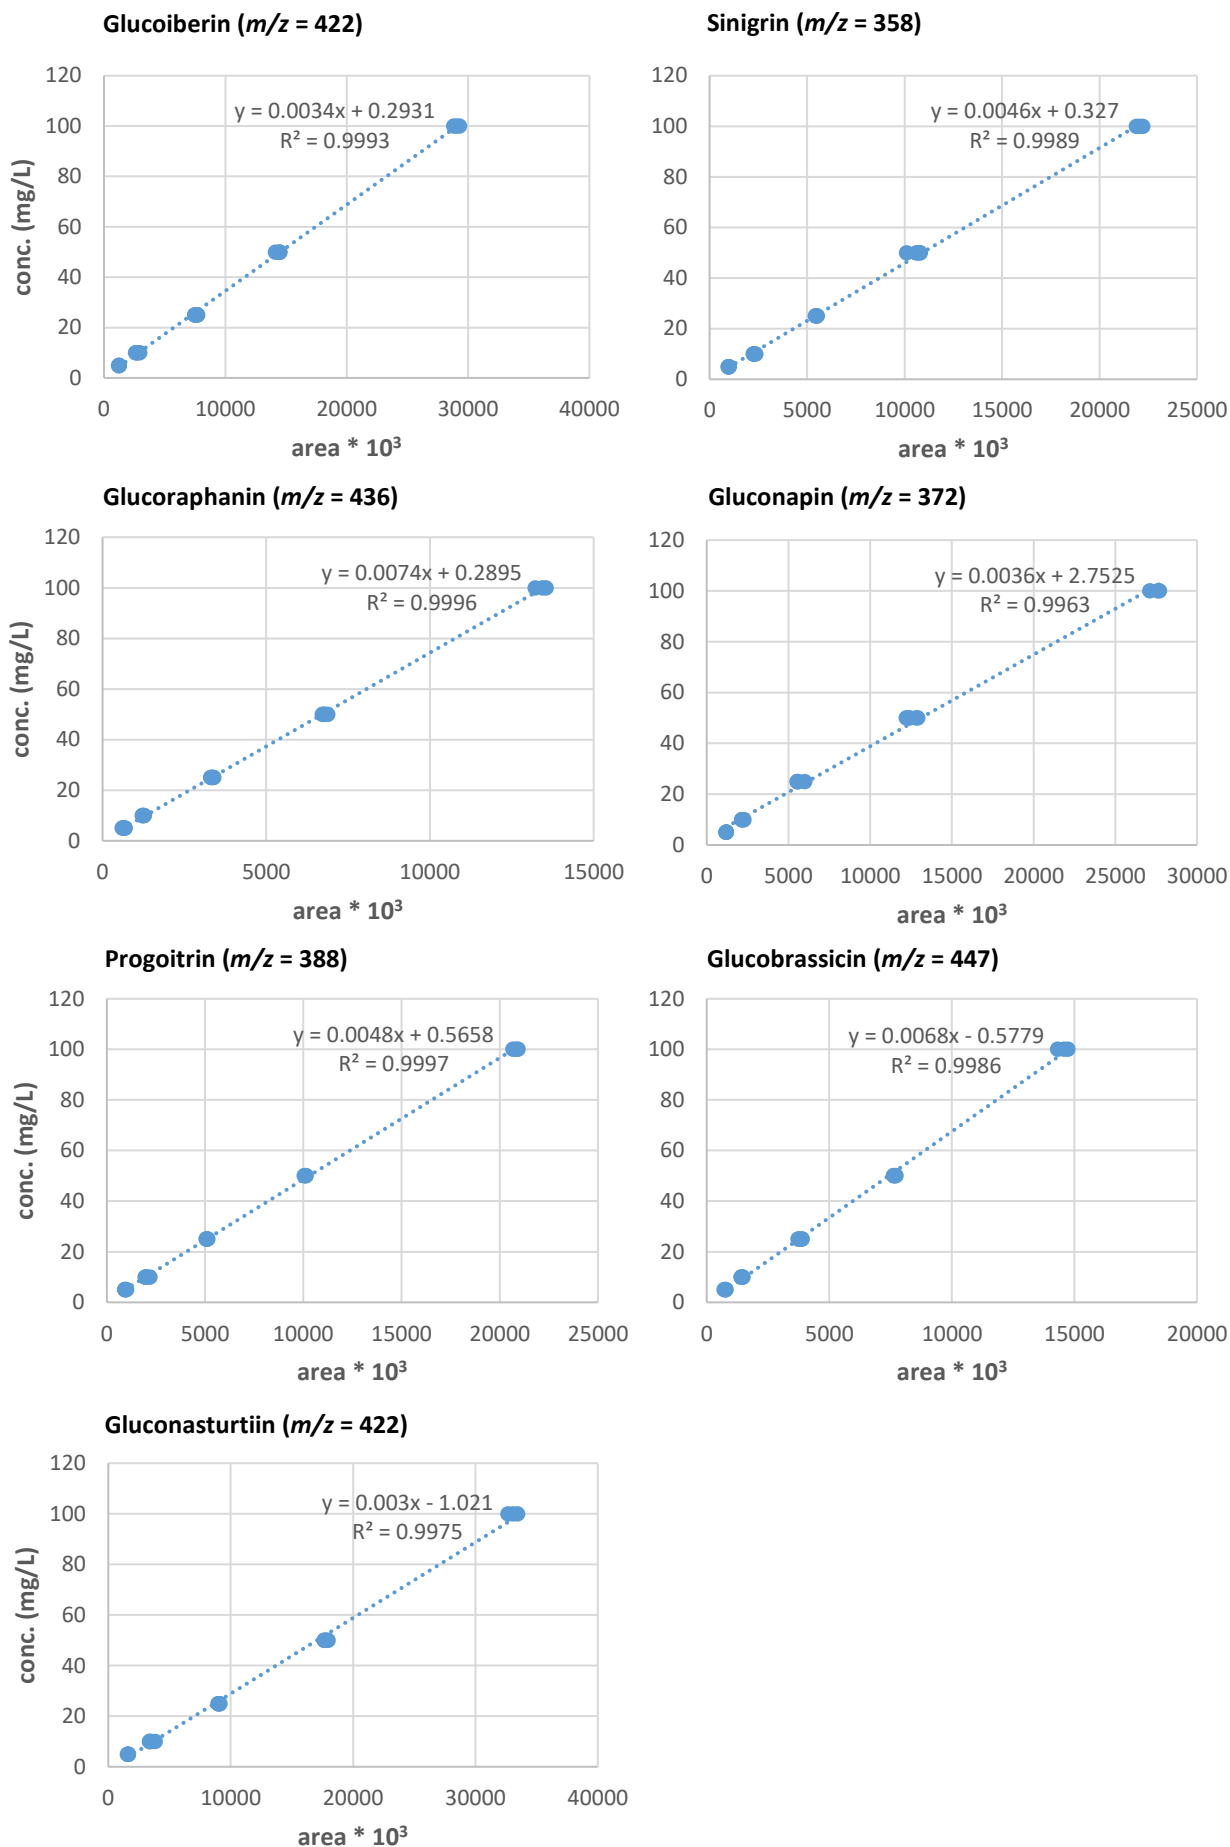

**Figure S1.** Calibration curves of the seven glucosinolates included in this study, obtained from analytical standard glucosinolates. The calibration functions were used for calculating the glucosinolate content of the kale samples analyzed in this study.
