# Supplementary material
Source: MDPI journal article supplement (https://www.mdpi.com/2311-7524/9/9/953)
Supplement: s1 [file s1 › Supplementary Figure S2.pdf]

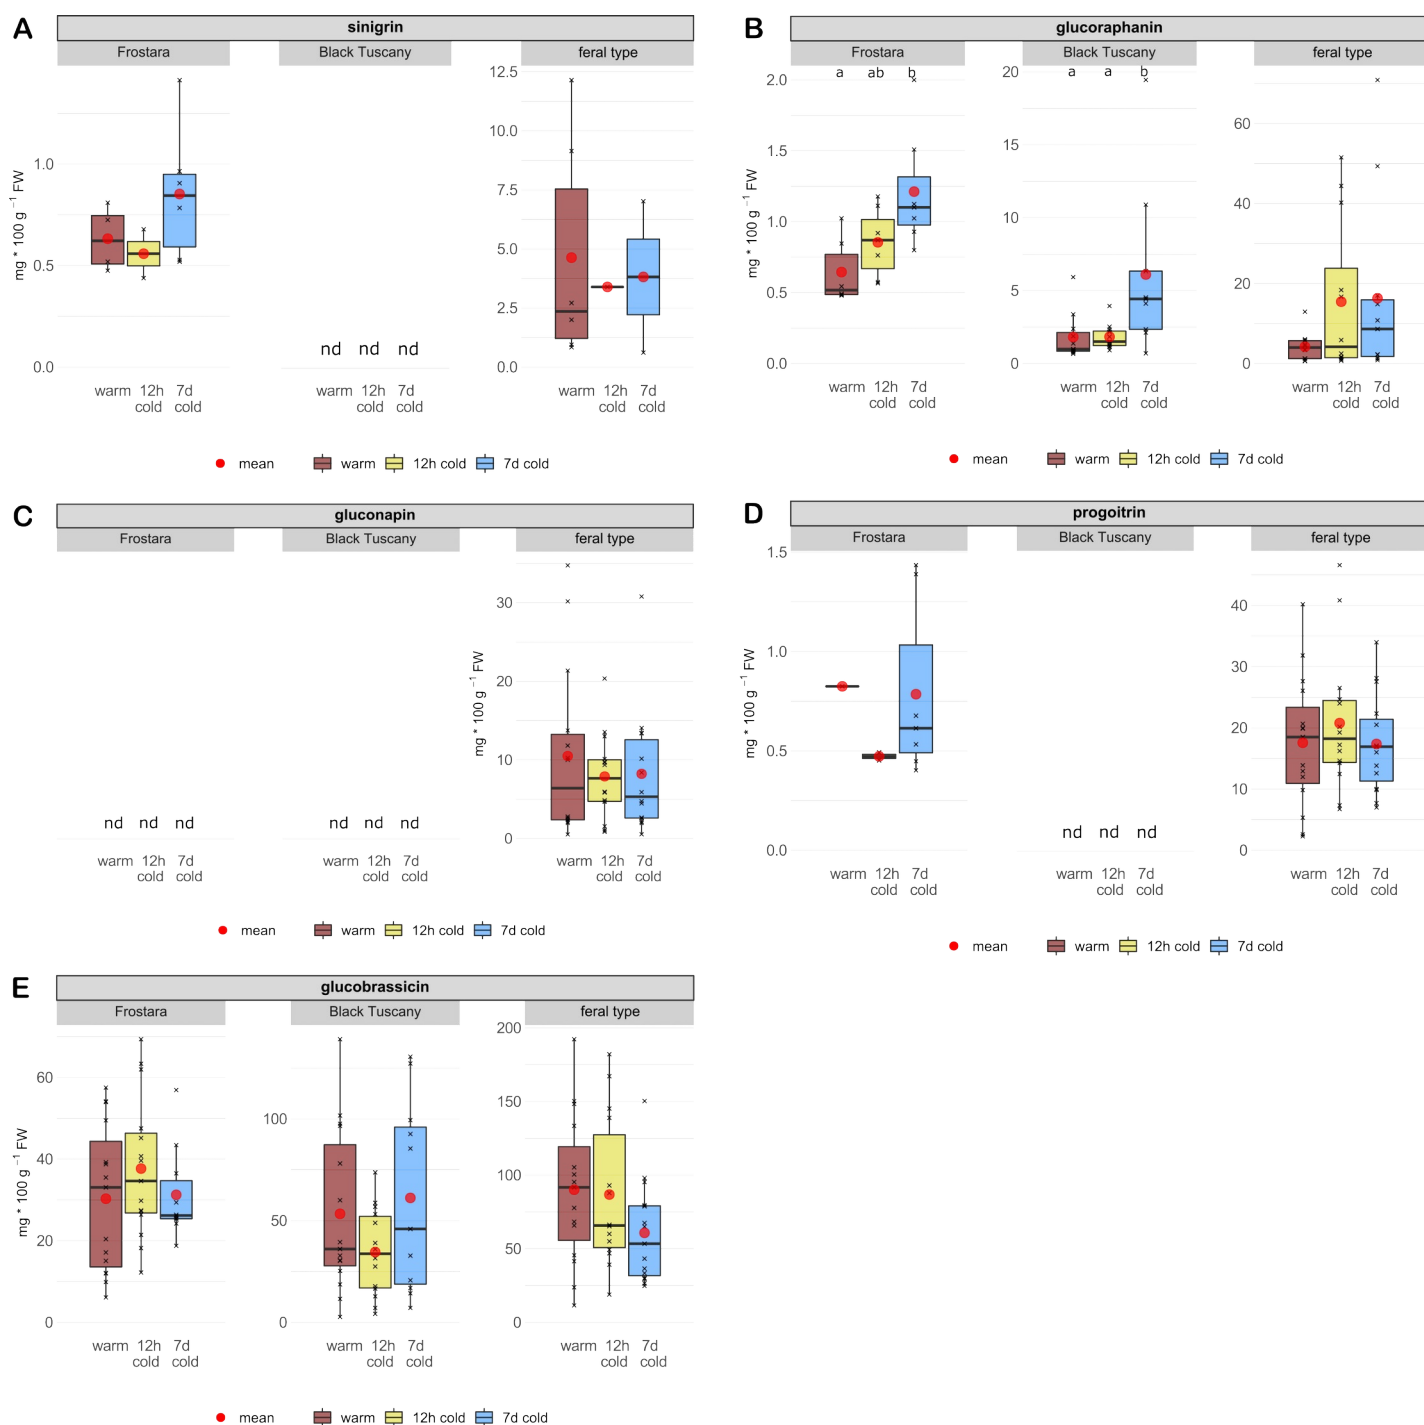

**Figure S2.** Overview of glucosinolate levels (mg 100 g<sup>-1</sup> FW) in different kale cultivars (curly kale “Frostara”, Lacinato kale “Black Tuscany”, and feral-type “Helgoländer”) cultivated in warm temperature conditions (“warm”) as well as after cold acclimation (“12 h cold” and “7 d cold”, respectively). Individual data points (crosses) as well as mean and median are shown. Note the different scales. nd = not detected. Different letters above bars indicate significant differences at  $p < 0.05$ . Note: GI and GA have not been detected in any of the plants and are, therefore, not displayed.
