# Supplementary material
Source: MDPI journal article supplement (https://www.mdpi.com/2311-7524/9/9/953)
Supplement: s1 [file s1 › Supplementary File S1.txt]

################################################################################
#  "A cold case - Glucosinolate levels in kale cultivars are differently 
#                 influenced by cold temperature"
#  Christoph Hahn, Anja Müller, Nikolai Kuhnert, and Dirk C. Albach
#  August 2023
#
#  Supplementary Information File S1
#  R script for data analysis
#
################################################################################


### 1) set working-directory

### 2) load data

Glucos <- read.csv("Kale_R.csv", sep=",", dec=".", header=T, fill = T, na.strings = "NA")

### 3) overview of data

str(Glucos)
summary(Glucos)
dim(Glucos)
names(Glucos)


### 4) make subsets

subset_F <- subset(Glucos, group=="Frostara")   # only kale variety 'Frostara'
subset_B <- subset(Glucos, group=="BlackT")     # only kale variety 'Black T'
subset_W <- subset(Glucos, group=="Wildkohl")   # only wild cabbage


#########################################
###
### 5) Create boxplot with jitter (i.e., displaying the data points) 
###
#########################################


# load packages needed
library(tidyverse)
library(hrbrthemes)
library(viridis)
library(ggplot2)      #for grouped boxplot
library(forcats)      #for re-ordering
library(tidyr)        #for re-shaping data to long format


# create textbox-headline for plot:

element_textbox <- function(...) {
  el <- element_text(...)
  class(el) <- c("element_textbox", class(el))
  el
}

element_grob.element_textbox <- function(element, ...) {
  text_grob <- NextMethod()
  rect_grob <- element_grob(calc_element("strip.background", theme_bw()))
  
  ggplot2:::absoluteGrob(
    grid::gList(
      element_grob(calc_element("strip.background", theme_bw())),
      text_grob
    ),
    height = grid::grobHeight(text_grob), 
    width = grid::unit(1, "npc")
  )
}


# First Plot:
#
# For each glucosinolate individually:
# Comparison of the three sampling times (day 0, 12h, 7d) 
# separately for each kale variety (displayed as facet plots side by side)
#
#

y_axis_label <- expression("mg * 100g " ^-1* " FW")     # y-axis label
facet_plot_titels <- c(Frostara= "Frostara", 
                       BlackT = "Black Tuscany", 
                       Wildkohl = "wild cabbage")       # titel of facet plots 


Glucos %>%
  mutate(treatment = fct_relevel(treatment, 
                                 "warm", "12h cold", "7d cold")) %>%      # reorder treatments
  
  mutate(group = fct_relevel(group, 
                             "Frostara", "BlackT", "Wildkohl")) %>%       # reorder varieties 
  
  ggplot( aes(x=group, y=glucobrassicin, fill=treatment)) +               # grouped boxplots: the subgroup is called in the "fill"-argument, and the group in the "x"-argument
  geom_boxplot(outlier.shape = NA) +                                      # hide the outliers (don't mark them specifically)
  scale_fill_viridis(discrete = TRUE, alpha=0.6, option="turbo",                     
                     begin=0.2, direction=-1,                      
                     breaks=c("warm", "12h cold", "7d cold", "mean")) +   # alpha = transparency; breaks = order of elements in the legend 
  geom_jitter(color="black", pch=4, size=1.0, alpha=0.9, show.legend=F, 
              position = position_jitterdodge(dodge.width = 0.75, jitter.width=0.0)) +   # add all individual observations on top of boxes
  stat_summary(fun.y=mean, aes(group=treatment), geom="point", shape=20, size=5, 
                                                 color="red", fill="red", alpha=0.7, 
                                                 position=position_dodge(0.75)) +        # plot mean value onto boxplots  (aes => mean is plotted on all three treatments; 'position' has to be adjusted to make sure that the data points are not in one vertical line)
  geom_point(aes(shape = "mean"), alpha = 0, size=3, color="red", fill="red") +          # plot the mean within the legend; make separate point and add it as legend (next line)
  guides(shape=guide_legend(title=NULL, override.aes = list(alpha = 1))) +   
  theme_ipsum() +
  theme(
    legend.position="bottom",                                      
    legend.title = element_blank(),
    legend.text = element_text(size=11, family="Arial"),                       
    plot.title = element_textbox(hjust=0.5, margin=margin(t=4, b=4), face="bold", size=12, family="Arial"),
    axis.title.y = element_text(size=11, hjust = 0.5, family="Arial"),                   # center y-axis labels
  ) +
  theme(
    text=element_text(family="Arial")                                            # define font
  ) +
  labs(
    x = "", 
    y = y_axis_label, 
    title= "glucobrassicin"
  ) + 
  ylim(c(0,NA)) +                                                                # set y-axis minimum to 0 
  scale_x_discrete(labels=c("warm  12h   7d\n            cold   cold")) +        # x-axis labels 
  theme(                                        
    panel.grid.major.x = element_blank() ,                                       # remove the vertical grid lines
    panel.grid.major.y = element_line(size=.1, color="grey" )                    # explicitly set the horizontal lines (or they will disappear too)
  ) +
  theme(
    strip.text.x = element_text(size=11, family="Arial", vjust=1.0, hjust=0.5),  # adjust top-labels from facet plots
    strip.background = element_rect(colour="lightgrey", fill="lightgrey")        # set background color of facet plot headings
  ) +
  facet_wrap(~group, scale="free", labeller=labeller(group=facet_plot_titels))   # assembles multiple plots to one graphic


# save the plot

ggsave(
  "Glucobrassicin.pdf",
  plot = last_plot(),
  device = cairo_pdf,
  path = NULL,
  dpi = 300,
)

ggsave(
  "Glucobrassicin.png",
  plot = last_plot(),
  device = "png",
  path = NULL,
  dpi = 400,
)


# Repeat this for all glucosinolates
# --> only change lines 98 and 124 
#
#


###############################################################

# Second Plot:
#
# For each kale variety individually:
# Comparison of the different glucosinolates (displayed as facet plots side by side)
# 
#


y_axis_label <- expression("mg * 100g " ^-1* " FW")     # y-axis label


# Reshape data to long format (all glucosinolates in one row)
Glucos_long <- gather(Glucos, key="glucosinolat", value="data", 4:10)   # “gather” the values from columns 4-10 into two new columns called “glucosinolat” and “data”


### make subsets

subset_F <- subset(Glucos_long, group=="Frostara")   # only kale variety 'Frostara'
subset_B <- subset(Glucos_long, group=="BlackT")     # only kale variety 'Black T'
subset_W <- subset(Glucos_long, group=="Wildkohl")   # only wild cabbage


subset_W %>%
  mutate(treatment = fct_relevel(treatment, 
                                 "warm", "12h cold", "7d cold")) %>%            # reorder treatments
  
  mutate(glucosinolat = fct_relevel(glucosinolat, 
                                    "sinigrin", "glucoraphanin", 
                                    "gluconapin", "progoitrin",  
                                    "glucobrassicin", "glucoiberin", "gluconasturtiin")) %>%       # reorder glucosinolates
  
  ggplot( aes(x=glucosinolat, y=data, fill=treatment)) +                        # grouped boxplots: the subgroup is called in the "fill"-argument, and the group in the "x"-argument
  geom_boxplot(outlier.shape = NA) +                                            # hide the outliers (don't mark them specifically)
  scale_fill_viridis(discrete = TRUE, alpha=0.6, option="turbo",                     
                     begin=0.2, direction=-1,                      
                     breaks=c("warm", "12h cold", "7d cold", "mean")) +         # alpha = transparency; breaks = order of elements in the legend 
  geom_jitter(color="black", pch=4, size=1.0, alpha=0.9, show.legend=F, 
              position = position_jitterdodge(dodge.width = 0.75, jitter.width=0.0)) +     # add all individual observations on top of boxes
  stat_summary(fun.y=mean, aes(group=treatment), geom="point", shape=20, size=5, 
               color="red", fill="red", alpha=0.7, 
               position=position_dodge(0.75)) +                                            # plot mean value onto boxplots  (aes => mean is plotted on all three treatments; 'position' has to be adjusted to make sure that the data points are not in one vertical line)
  geom_point(aes(shape = "mean"), alpha = 0, size=3, color="red", fill="red") +            # plot the mean within the legend; make separate point and add it as legend (next line)
  guides(shape=guide_legend(title=NULL, override.aes = list(alpha = 1))) +   
  theme_ipsum() +
  theme(
    legend.position="bottom",                                      
    legend.title = element_blank(),
    legend.text = element_text(size=11, family="Arial"),                       
    plot.title = element_textbox(hjust=0.5, margin=margin(t=4, b=4), face="bold", size=12, family="Arial"),
    axis.title.y = element_text(size=11, hjust = 0.5, family="Arial"),                     # center y-axis labels
    #axis.title.x = element_text(hjust=1),
  ) +
  theme(
    text=element_text(family="Arial")                                           # define font
  ) +
  labs(
    x = "", 
    y = y_axis_label, 
    title= "wild cabbage"
  ) + 
  ylim(c(0,NA)) +                                                               # set y-axis minimum to 0 
  scale_x_discrete(labels=c("warm  12h   7d\n            cold   cold")) +       # x-axis labels
  theme(                                        
    panel.grid.major.x = element_blank() ,                                      # remove the vertical grid lines
    panel.grid.major.y = element_line(size=.1, color="grey" )                   # explicitly set the horizontal lines (or they will disappear too)
  ) +
  theme(
    strip.text.x = element_text(size=11, family="Arial", vjust=1.0, hjust=0.5), # adjust top-labels from facet plots
    strip.background = element_rect(colour="lightgrey", fill="lightgrey")       # set background color of facet plot headings
  ) +
  facet_wrap(~glucosinolat, scale="free", nrow=1)                               # assembles multiple plots to one graphic, in one row with individual y-axes
  #facet_wrap(~glucosinolat, scale="free_x", nrow=1)                            # same y-axis for all plots, all in one row side-by-side 


# save the plot

ggsave(
  "wild_cabbage.pdf",
  plot = last_plot(),
  device = cairo_pdf,
  path = NULL,
  dpi = 300,
  width = 14.58,    
  height = 5.21,     
  units = "in"
)

ggsave(
  "wild_cabbage.png",
  plot = last_plot(),
  device = "png",
  path = NULL,
  dpi = 400, 
  width = 14.58,    
  height = 5.21,   
  units = "in",
  limitsize = F
)


# Repeat this for all varieties
# --> only change lines 194 and 229
#
#


#########################################
###
### 6) ANOVA Statistics 
###
#########################################


### N.B.: Repeat the following tests for all glucosinolates separately


###
### 6a) Check for normality of the residuals 
###

datori <- aov(glucobrassicin~treatment, data=Glucos)  
summary(datori)   
shapiro.test(datori$residuals)    # normality, if p > 0.05  


###
### 6b) Check for homogeneity of variances of the data:
###

library(car)
leveneTest(glucobrassicin~treatment, data=Glucos)                       # equal variances, if p > 0.05 

leveneTest(glucobrassicin~treatment, kruskal.test=T, data=Glucos)       # if data is not normally distributed, use Kruskal-Wallis statistic


###
### 6c) Test for significant differences of the data:
###


# N.B.: Repeat the following tests for...
#
# ... comparison of the three sampling times (day 0, 12h, 7d)
#     separately for each kale variety (see above lines 30-32 for subsets)
#     and separately for each glucosinolate.
#
# ... comparison of the three kale varieties (no subset)
#     with all sampling times together
#     and for each glucosinolate separately.
#
# ... comparison of the three kale varieties 
#     separately for each sampling time (subsets)
#     and for each glucosinolate separately.
#


###
### (i) If data is normally distributed --> ANOVA & Tukey-Test:
###

summary(aov(glucobrassicin~treatment, data=Glucos))

TukeyHSD(aov(glucobrassicin~treatment, data=Glucos))                    # PostHoc-Test


###
### (ii) If data is not normally distributed --> Kruskal-Wallis-Test & Pairwise-t-Test:
###

kruskal.test(glucobrassicin~treatment, data=Glucos)

pairwise.t.test(Glucos$glucobrassicin, Glucos$treatment,                # PostHoc-Test
                p.adj="bonferroni", pool.sd=T, paired=F)     


###
### (iii) If variances of data are inhomogeneous --> Welch-Test & Pairwise-t-Test: 
###

oneway.test(glucobrassicin~treatment, var.equal=FALSE, data=Glucos)    # (Welch's anova for unequal variances)


pairwise.t.test(Glucos$glucobrassicin, Glucos$treatment,               # PostHoc-Test
                p.adj="bonferroni", pool.sd=T, paired=F)     


#
# End of script
#
#
#########################################################################################################################
