# Supplementary material
Source: MDPI journal article supplement (https://www.mdpi.com/2311-7524/9/9/953)
Supplement: s1 [file s1 › Supplementary Tables S1-S6.pdf]

**Table S1.** Glucosinolate levels (mg 100 g<sup>-1</sup> FW) of all individual plants measured for curly kale “Frostara” (F), cultivated in warm temperature conditions (“warm”) as well as after cold acclimation (“12h” and “7d”, respectively). nd = not detected.

| sample   | aliphatics |      |      |    |      | indole | aromatic |
|----------|------------|------|------|----|------|--------|----------|
|          | GI         | SIN  | GR   | GN | PR   | GB     | GA       |
| F2-warm  | nd         | nd   | 0.48 | nd | nd   | 39.23  | nd       |
| F37-warm | nd         | nd   | nd   | nd | nd   | 6.12   | nd       |
| F31-warm | nd         | nd   | 0.49 | nd | nd   | 9.89   | nd       |
| F28-warm | nd         | 0.73 | 0.54 | nd | nd   | 17.14  | nd       |
| F5-warm  | nd         | 0.81 | 0.85 | nd | nd   | 54.16  | nd       |
| F1-warm  | nd         | nd   | nd   | nd | nd   | 11.99  | nd       |
| F41-warm | nd         | nd   | 1.02 | nd | nd   | 33.07  | nd       |
| F47-warm | nd         | 0.48 | 0.48 | nd | nd   | 35.50  | nd       |
| F39-warm | nd         | nd   | nd   | nd | 0.82 | 38.75  | nd       |
| F4-warm  | nd         | nd   | nd   | nd | nd   | 49.48  | nd       |
| F10-warm | nd         | nd   | nd   | nd | nd   | 57.52  | nd       |
| F21-warm | nd         | 0.52 | nd   | nd | nd   | 12.12  | nd       |
| F22-warm | nd         | nd   | nd   | nd | nd   | 15.07  | nd       |
| F16-warm | nd         | nd   | nd   | nd | nd   | 53.97  | nd       |
| F60-warm | nd         | nd   | nd   | nd | nd   | 20.41  | nd       |
| F12-12h  | nd         | 0.68 | 0.56 | nd | 0.49 | 63.37  | nd       |
| F17-12h  | nd         | nd   | nd   | nd | nd   | 12.23  | nd       |
| F34-12h  | nd         | nd   | 0.57 | nd | nd   | 26.39  | nd       |
| F33-12h  | nd         | nd   | 0.92 | nd | nd   | 27.43  | nd       |
| F11-12h  | nd         | nd   | nd   | nd | nd   | 29.81  | nd       |
| F26-12h  | nd         | 0.44 | 1.18 | nd | nd   | 27.24  | nd       |
| F19-12h  | nd         | nd   | nd   | nd | nd   | 61.97  | nd       |
| F46-12h  | nd         | nd   | nd   | nd | nd   | 34.63  | nd       |
| F25-12h  | nd         | nd   | nd   | nd | nd   | 69.37  | nd       |
| F44-12h  | nd         | nd   | 0.87 | nd | nd   | 40.70  | nd       |
| F40-12h  | nd         | nd   | nd   | nd | nd   | 21.45  | nd       |
| F32-12h  | nd         | nd   | nd   | nd | nd   | 45.17  | nd       |
| F15-12h  | nd         | nd   | 0.76 | nd | 0.45 | 39.63  | nd       |
| F29-12h  | nd         | nd   | nd   | nd | nd   | 18.20  | nd       |
| F18-12h  | nd         | nd   | 1.11 | nd | nd   | 47.53  | nd       |
| F36-7d   | nd         | 1.41 | 2.00 | nd | 1.44 | 29.40  | nd       |
| F42-7d   | nd         | 0.78 | 1.12 | nd | 0.53 | 25.60  | nd       |
| F42-2-7d | nd         | nd   | nd   | nd | nd   | nd     | nd       |
| F13-7d   | nd         | nd   | nd   | nd | nd   | 18.75  | nd       |
| F3-7d    | nd         | nd   | nd   | nd | nd   | 26.35  | nd       |
| F30-7d   | nd         | nd   | 0.80 | nd | 0.40 | 43.42  | nd       |
| F45-7d   | nd         | 0.96 | 1.02 | nd | 1.39 | 24.23  | nd       |
| F7-7d    | nd         | nd   | nd   | nd | nd   | 25.33  | nd       |
| F60-7d   | nd         | 0.91 | 1.51 | nd | 0.68 | 26.03  | nd       |
| F61-7d   | nd         | 0.53 | 0.93 | nd | 0.45 | 36.51  | nd       |
| F20-7d   | nd         | 0.52 | 1.10 | nd | 0.61 | 56.93  | nd       |

**Table S2.** Glucosinolate levels (mg 100 g<sup>-1</sup> FW) of all individual plants measured for Lacinato kale “Black Tuscany” (B), cultivated in warm temperature conditions (“warm”) as well as after cold acclimation (“12h” and “7d”, respectively). nd = not detected.

| sample   | aliphatics |     |       |    |    | indole | aromatic |
|----------|------------|-----|-------|----|----|--------|----------|
|          | GI         | SIN | GR    | GN | PR | GB     | GA       |
| B26-warm | nd         | nd  | 0.99  | nd | nd | 11.58  | nd       |
| B35-warm | nd         | nd  | 0.95  | nd | nd | 30.54  | nd       |
| B12-warm | nd         | nd  | 5.93  | nd | nd | 32.81  | nd       |
| B33-warm | nd         | nd  | nd    | nd | nd | 25.32  | nd       |
| B19-warm | nd         | nd  | 3.37  | nd | nd | 78.10  | nd       |
| B31-warm | nd         | nd  | 0.84  | nd | nd | 30.25  | nd       |
| B41-warm | nd         | nd  | 2.38  | nd | nd | 18.67  | nd       |
| B10-warm | nd         | nd  | 1.88  | nd | nd | 39.44  | nd       |
| B11-warm | nd         | nd  | 0.76  | nd | nd | 60.03  | nd       |
| B40-warm | nd         | nd  | 1.38  | nd | nd | 36.08  | nd       |
| B27-warm | nd         | nd  | 0.66  | nd | nd | 101.66 | nd       |
| B45-warm | nd         | nd  | nd    | nd | nd | 2.69   | nd       |
| B37-warm | nd         | nd  | 0.85  | nd | nd | 96.58  | nd       |
| B42-warm | nd         | nd  | nd    | nd | nd | 139.16 | nd       |
| B21-warm | nd         | nd  | nd    | nd | nd | 97.65  | nd       |
| B44-12h  | nd         | nd  | 2.29  | nd | nd | 53.20  | nd       |
| B15-12h  | nd         | nd  | 1.28  | nd | nd | 39.03  | nd       |
| B17-12h  | nd         | nd  | 0.91  | nd | nd | 7.13   | nd       |
| B30-12h  | nd         | nd  | nd    | nd | nd | 27.48  | nd       |
| B38-12h  | nd         | nd  | 1.39  | nd | nd | 4.21   | nd       |
| B6-12h   | nd         | nd  | 3.95  | nd | nd | 517.83 | nd       |
| B2-12h   | nd         | nd  | 1.18  | nd | nd | 17.73  | nd       |
| B13-12h  | nd         | nd  | 1.50  | nd | nd | 35.96  | nd       |
| B23-12h  | nd         | nd  | nd    | nd | nd | 58.78  | nd       |
| B9-12h   | nd         | nd  | 1.14  | nd | nd | 16.63  | nd       |
| B5-12h   | nd         | nd  | 2.53  | nd | nd | 31.54  | nd       |
| B32-12h  | nd         | nd  | nd    | nd | nd | 56.84  | nd       |
| B1-12h   | nd         | nd  | nd    | nd | nd | 73.69  | nd       |
| B14-12h  | nd         | nd  | 2.17  | nd | nd | 48.89  | nd       |
| B39-12h  | nd         | nd  | 1.83  | nd | nd | 12.81  | nd       |
| B46-7d   | nd         | nd  | 19.45 | nd | nd | 130.56 | nd       |
| B18-7d   | nd         | nd  | 2.12  | nd | nd | 92.59  | nd       |
| B25-7d   | nd         | nd  | nd    | nd | nd | 7.12   | nd       |
| B7-7d    | nd         | nd  | 4.53  | nd | nd | 32.79  | nd       |
| B60-7d   | nd         | nd  | 0.70  | nd | nd | 16.91  | nd       |
| B47-7d   | nd         | nd  | 6.34  | nd | nd | 20.71  | nd       |
| B24-7d   | nd         | nd  | 2.34  | nd | nd | 99.43  | nd       |
| B29-7d   | nd         | nd  | nd    | nd | nd | 45.92  | nd       |
| B8-7d    | nd         | nd  | 10.89 | nd | nd | 127.23 | nd       |
| B61-7d   | nd         | nd  | 4.43  | nd | nd | 14.29  | nd       |
| B36-7d   | nd         | nd  | 4.11  | nd | nd | 85.45  | nd       |

**Table S3.** Glucosinolate levels (mg 100 g<sup>-1</sup> FW) of all individual plants measured for feral-type “Helgoländer” (W), cultivated in warm temperature conditions (“warm”) as well as after cold acclimation (“12h” and “7d”, respectively). nd = not detected.

| sample   | aliphatics |       |       |       |       | indole | aromatic |
|----------|------------|-------|-------|-------|-------|--------|----------|
|          | GI         | SIN   | GR    | GN    | PR    | GB     | GA       |
| W17-warm | nd         | nd    | 0.59  | 2.80  | 11.99 | 133.48 | nd       |
| W35-warm | nd         | nd    | nd    | 2.39  | 5.32  | 65.82  | nd       |
| W43-warm | nd         | nd    | 12.96 | 2.37  | 13.88 | 192.31 | nd       |
| W32-warm | nd         | nd    | 3.42  | 21.37 | 19.89 | 105.32 | nd       |
| W28-warm | nd         | 0.95  | 6.07  | 34.75 | 31.83 | 23.81  | nd       |
| W41-warm | nd         | nd    | 1.23  | 10.26 | 20.66 | 148.41 | nd       |
| W1-warm  | nd         | 0.84  | nd    | 13.75 | 40.19 | 150.20 | nd       |
| W42-warm | nd         | 9.15  | 4.50  | 10.01 | 19.97 | 45.60  | nd       |
| W11-warm | nd         | nd    | 5.77  | nd    | 2.27  | 100.46 | nd       |
| W7-warm  | nd         | nd    | 4.78  | 0.52  | 2.60  | 41.58  | nd       |
| W6-warm  | nd         | nd    | 1.22  | 30.18 | 12.92 | 95.33  | nd       |
| W23-warm | nd         | 12.15 | 5.69  | 11.82 | 27.62 | 77.75  | nd       |
| W31-warm | nd         | nd    | nd    | 2.61  | 26.06 | 11.50  | nd       |
| W27-warm | nd         | 2.71  | 0.73  | 2.14  | 18.50 | 68.34  | nd       |
| W12-warm | nd         | 2.00  | 3.49  | 1.97  | 9.84  | 91.71  | nd       |
| W13-12h  | nd         | 3.39  | 2.49  | 5.85  | 12.46 | 60.10  | nd       |
| W33-12h  | nd         | nd    | 51.55 | 4.67  | 14.26 | 65.35  | nd       |
| W37-12h  | nd         | nd    | nd    | 5.95  | 17.22 | 66.27  | nd       |
| W46-12h  | nd         | nd    | nd    | nd    | nd    | nd     | nd       |
| W26-12h  | nd         | nd    | 1.70  | 9.36  | 40.84 | 145.24 | nd       |
| W5-12h   | nd         | nd    | 1.53  | 9.66  | 14.61 | 18.91  | nd       |
| W18-12h  | nd         | nd    | 40.23 | 10.12 | 24.00 | 39.24  | nd       |
| W19-12h  | nd         | nd    | 5.88  | 20.37 | 46.59 | 167.20 | nd       |
| W29-12h  | nd         | nd    | 18.37 | 1.03  | 16.23 | 87.86  | nd       |
| W21-12h  | nd         | nd    | 0.72  | 13.55 | 24.63 | 49.35  | nd       |
| W20-12h  | nd         | nd    | nd    | 1.55  | 7.33  | 46.91  | nd       |
| W34-12h  | nd         | nd    | 16.69 | 0.84  | 6.73  | 182.14 | nd       |
| W60-12h  | nd         | nd    | 44.41 | 4.87  | 19.25 | 138.89 | nd       |
| W9-12h   | nd         | nd    | 0.77  | 9.75  | 20.17 | 93.02  | nd       |
| W22-12h  | nd         | nd    | 1.16  | 13.00 | 26.52 | 55.07  | nd       |
| W38-7d   | nd         | nd    | 2.22  | 13.42 | 22.33 | 65.07  | nd       |
| W45-7d   | nd         | 0.61  | 70.92 | 14.07 | 28.12 | 98.02  | nd       |
| W25-7d   | nd         | nd    | 49.35 | 0.53  | 12.59 | 150.33 | nd       |
| W8-7d    | nd         | nd    | nd    | 4.47  | 9.85  | 43.29  | nd       |
| W10-7d   | nd         | nd    | nd    | 4.74  | 17.01 | 24.77  | nd       |
| W24-7d   | nd         | nd    | 0.82  | 10.15 | 17.08 | 78.82  | nd       |
| W61-7d   | nd         | nd    | 10.80 | 2.15  | 10.02 | 53.46  | nd       |
| W62-7d   | nd         | nd    | nd    | 1.98  | 6.99  | 33.45  | nd       |
| W63-7d   | nd         | nd    | 8.63  | 2.58  | 7.69  | 29.57  | nd       |
| W64-7d   | nd         | nd    | 14.86 | 2.66  | 16.92 | 79.52  | nd       |
| W65-7d   | nd         | nd    | nd    | 8.39  | 16.01 | 26.50  | nd       |
| W66-7d   | nd         | nd    | 1.30  | nd    | 27.56 | 30.03  | nd       |
| W44-7d   | nd         | 7.02  | 1.30  | 13.38 | 13.82 | 36.53  | nd       |
| W16-7d   | nd         | nd    | 2.28  | 30.79 | 33.99 | 95.31  | nd       |
| W3-7d    | nd         | nd    | 17.00 | 5.90  | 20.50 | 67.49  | nd       |

**Table S4.** Glucosinolate levels (mg 100 g<sup>-1</sup> FW) of all individual control plants measured for curly kale “Frostara” (F), cultivated at constant warm temperatures. Samples were taken at the same time-points as in the main experiment (“warm” (day 0), “12h”, and “7d”). nd = not detected.

| sample    | aliphatics |     |    |    |    | indole | aromatic |
|-----------|------------|-----|----|----|----|--------|----------|
|           | GI         | SIN | GR | GN | PR | GB     | GA       |
| F37K-warm | nd         | nd  | nd | nd | nd | 39.31  | nd       |
| F17K-warm | nd         | nd  | nd | nd | nd | 30.74  | nd       |
| F45K-warm | nd         | nd  | nd | nd | nd | 19.55  | nd       |
| F42K-warm | nd         | nd  | nd | nd | nd | 44.59  | nd       |
| F12K-warm | nd         | nd  | nd | nd | nd | 28.97  | nd       |
| F35K-warm | nd         | nd  | nd | nd | nd | 28.91  | nd       |
| F32K-warm | nd         | nd  | nd | nd | nd | 42.11  | nd       |
| F9K-warm  | nd         | nd  | nd | nd | nd | 54.02  | nd       |
| F15K-warm | nd         | nd  | nd | nd | nd | 39.40  | nd       |
| F2K-warm  | nd         | nd  | nd | nd | nd | 30.20  | nd       |
| F7K-warm  | nd         | nd  | nd | nd | nd | 33.55  | nd       |
| F24K-warm | nd         | nd  | nd | nd | nd | 46.77  | nd       |
| F25K-warm | nd         | nd  | nd | nd | nd | 59.15  | nd       |
| F28K-warm | nd         | nd  | nd | nd | nd | 67.94  | nd       |
| F22K-warm | nd         | nd  | nd | nd | nd | 45.80  | nd       |
| F19K-12h  | nd         | nd  | nd | nd | nd | 59.07  | nd       |
| F3K-12h   | nd         | nd  | nd | nd | nd | 30.10  | nd       |
| F41K-12h  | nd         | nd  | nd | nd | nd | 35.48  | nd       |
| F47K-12h  | nd         | nd  | nd | nd | nd | 53.54  | nd       |
| F39K-12h  | nd         | nd  | nd | nd | nd | 97.21  | nd       |
| F34K-12h  | nd         | nd  | nd | nd | nd | 42.10  | nd       |
| F31K-12h  | nd         | nd  | nd | nd | nd | 15.28  | nd       |
| F11K-12h  | nd         | nd  | nd | nd | nd | 64.93  | nd       |
| F14K-12h  | nd         | nd  | nd | nd | nd | 38.61  | nd       |
| F1K-12h   | nd         | nd  | nd | nd | nd | 104.51 | nd       |
| F29K-12h  | nd         | nd  | nd | nd | nd | 19.69  | nd       |
| F10K-12h  | nd         | nd  | nd | nd | nd | 41.05  | nd       |
| F13K-12h  | nd         | nd  | nd | nd | nd | 42.58  | nd       |
| F26K-12h  | nd         | nd  | nd | nd | nd | 68.88  | nd       |
| F23K-12h  | nd         | nd  | nd | nd | nd | 12.77  | nd       |
| F21K-7d   | nd         | nd  | nd | nd | nd | 45.83  | nd       |
| F44K-7d   | nd         | nd  | nd | nd | nd | 92.03  | nd       |
| F6K-7d    | nd         | nd  | nd | nd | nd | 42.15  | nd       |
| F40K-7d   | nd         | nd  | nd | nd | nd | 54.30  | nd       |
| F16K-7d   | nd         | nd  | nd | nd | nd | 62.01  | nd       |
| F4K-7d    | nd         | nd  | nd | nd | nd | 20.70  | nd       |
| F5K-7d    | nd         | nd  | nd | nd | nd | 40.02  | nd       |
| F20K-7d   | nd         | nd  | nd | nd | nd | 28.23  | nd       |
| F8K-7d    | nd         | nd  | nd | nd | nd | 25.98  | nd       |
| F46K-7d   | nd         | nd  | nd | nd | nd | nd     | nd       |
| F18K-7d   | nd         | nd  | nd | nd | nd | 32.94  | nd       |
| F43K-7d   | nd         | nd  | nd | nd | nd | 19.30  | nd       |
| F23-2K-7d | nd         | nd  | nd | nd | nd | 46.99  | nd       |
| F33K-7d   | nd         | nd  | nd | nd | nd | 21.50  | nd       |
| F30K-7d   | nd         | nd  | nd | nd | nd | 46.62  | nd       |

**Table S5.** Glucosinolate levels (mg 100 g<sup>-1</sup> FW) of all individual control plants measured for Lacinato kale “Black Tuscany” (B), cultivated at constant warm temperatures. Samples were taken at the same time-points as in the main experiment (“warm” (day 0), “12h”, and “7d”). nd = not detected.

| sample    | aliphatics |     |    |    |    | indole | aromatic |
|-----------|------------|-----|----|----|----|--------|----------|
|           | GI         | SIN | GR | GN | PR | GB     | GA       |
| B4K-warm  | nd         | nd  | nd | nd | nd | 87.14  | nd       |
| B18K-warm | nd         | nd  | nd | nd | nd | 93.91  | nd       |
| B38K-warm | nd         | nd  | nd | nd | nd | 44.20  | nd       |
| B44K-warm | nd         | nd  | nd | nd | nd | 26.56  | nd       |
| B45K-warm | nd         | nd  | nd | nd | nd | 5.92   | nd       |
| B43K-warm | nd         | nd  | nd | nd | nd | 30.17  | nd       |
| B1K-warm  | nd         | nd  | nd | nd | nd | 61.91  | nd       |
| B10K-warm | nd         | nd  | nd | nd | nd | 35.93  | nd       |
| B12K-warm | nd         | nd  | nd | nd | nd | 23.85  | nd       |
| B19K-warm | nd         | nd  | nd | nd | nd | 40.83  | nd       |
| B13K-warm | nd         | nd  | nd | nd | nd | 30.57  | nd       |
| B7K-warm  | nd         | nd  | nd | nd | nd | 11.19  | nd       |
| B40K-12h  | nd         | nd  | nd | nd | nd | 38.05  | nd       |
| B20K-12h  | nd         | nd  | nd | nd | nd | 40.37  | nd       |
| B21K-12h  | nd         | nd  | nd | nd | nd | 27.20  | nd       |
| B5K-12h   | nd         | nd  | nd | nd | nd | nd     | nd       |
| B46K-12h  | nd         | nd  | nd | nd | nd | 26.34  | nd       |
| B15K-12h  | nd         | nd  | nd | nd | nd | 37.35  | nd       |
| B32K-12h  | nd         | nd  | nd | nd | nd | 44.24  | nd       |
| B36K-12h  | nd         | nd  | nd | nd | nd | 126.03 | nd       |
| B47K-12h  | nd         | nd  | nd | nd | nd | 94.64  | nd       |
| B29K-12h  | nd         | nd  | nd | nd | nd | 75.06  | nd       |
| B30K-12h  | nd         | nd  | nd | nd | nd | 25.62  | nd       |
| B8K-12h   | nd         | nd  | nd | nd | nd | nd     | nd       |
| B3K-12h   | nd         | nd  | nd | nd | nd | 22.05  | nd       |
| B6K-7d    | nd         | nd  | nd | nd | nd | nd     | nd       |
| B22K-7d   | nd         | nd  | nd | nd | nd | 35.45  | nd       |
| B26K-7d   | nd         | nd  | nd | nd | nd | nd     | nd       |
| B16K-7d   | nd         | nd  | nd | nd | nd | nd     | nd       |
| B28K-7d   | nd         | nd  | nd | nd | nd | 53.14  | nd       |
| B17K-7d   | nd         | nd  | nd | nd | nd | nd     | nd       |
| B25K-7d   | nd         | nd  | nd | nd | nd | 60.46  | nd       |
| B2K-7d    | nd         | nd  | nd | nd | nd | nd     | nd       |
| B41K-7d   | nd         | nd  | nd | nd | nd | 67.46  | nd       |
| B31K-7d   | nd         | nd  | nd | nd | nd | 119.66 | nd       |
| B50K-7d   | nd         | nd  | nd | nd | nd | 68.36  | nd       |

**Table S6.** Glucosinolate levels (mg 100 g<sup>-1</sup> FW) of all individual control plants measured for feral-type “Helgoländer” (W), cultivated at constant warm temperatures. Samples were taken at the same time-points as in the main experiment (“warm” (day 0), “12h”, and “7d”). nd = not detected.

| sample    | aliphatics |      |       |      |       | indole | aromatic |
|-----------|------------|------|-------|------|-------|--------|----------|
|           | GI         | SIN  | GR    | GN   | PR    | GB     | GA       |
| W44K-warm | nd         | nd   | 0.40  | nd   | nd    | 147.53 | nd       |
| W11K-warm | nd         | 4.76 | nd    | nd   | nd    | 43.26  | nd       |
| W16K-warm | nd         | 1.10 | 11.98 | nd   | 3.12  | nd     | nd       |
| W39K-warm | nd         | nd   | nd    | 0.64 | 6.04  | 151.28 | nd       |
| W12K-warm | nd         | 4.45 | nd    | nd   | nd    | nd     | nd       |
| W37K-warm | nd         | nd   | nd    | 1.36 | 9.53  | 92.60  | nd       |
| W47K-warm | nd         | 7.17 | nd    | nd   | 21.31 | 189.37 | nd       |
| W6K-warm  | nd         | nd   | nd    | nd   | 2.34  | 181.52 | nd       |
| W2K-warm  | nd         | nd   | 1.21  | 1.72 | 11.14 | 355.37 | nd       |
| W4K-warm  | nd         | 0.63 | nd    | nd   | 0.89  | 17.44  | nd       |
| W35K-warm | nd         | nd   | nd    | nd   | 0.51  | 141.06 | nd       |
| W38K-warm | nd         | nd   | nd    | nd   | 7.69  | 356.33 | nd       |
| W24K-warm | nd         | nd   | nd    | nd   | 5.11  | 102.42 | nd       |
| W23K-warm | nd         | nd   | nd    | nd   | 1.46  | 79.28  | nd       |
| W26K-warm | nd         | 3.34 | nd    | 0.44 | 5.11  | 101.30 | nd       |
| W13K-12h  | nd         | nd   | nd    | nd   | 3.19  | 175.64 | nd       |
| W3K-12h   | nd         | nd   | nd    | nd   | 1.44  | 155.72 | nd       |
| W40K-12h  | nd         | nd   | 0.45  | nd   | nd    | 106.82 | nd       |
| W5K-12h   | nd         | 6.70 | nd    | 0.76 | 2.90  | 53.07  | nd       |
| W14K-12h  | nd         | nd   | nd    | nd   | nd    | 324.47 | nd       |
| W9K-12h   | nd         | nd   | 6.34  | nd   | 3.14  | 61.30  | nd       |
| W10K-12h  | nd         | nd   | nd    | 1.23 | 6.65  | 126.27 | nd       |
| W19K-12h  | nd         | nd   | nd    | 0.42 | 4.02  | 106.89 | nd       |
| W21K-12h  | nd         | nd   | 1.03  | 0.39 | 1.79  | 62.79  | nd       |
| W34K-12h  | nd         | nd   | 5.11  | 0.85 | 6.48  | 316.55 | nd       |
| W30K-12h  | nd         | nd   | 1.47  | 0.45 | 5.08  | 73.64  | nd       |
| W31K-12h  | nd         | 1.48 | nd    | 1.04 | 9.30  | 39.07  | nd       |
| W22K-12h  | nd         | nd   | 6.55  | 1.28 | 20.93 | 286.45 | nd       |
| W28K-12h  | nd         | 2.00 | nd    | nd   | nd    | 26.84  | nd       |
| W27K-12h  | nd         | nd   | 3.56  | nd   | 0.87  | 329.89 | nd       |
| W7K-7d    | nd         | 7.80 | nd    | 0.44 | 1.68  | 75.70  | nd       |
| W17K-7d   | nd         | nd   | nd    | nd   | 3.20  | 16.53  | nd       |
| W41K-7d   | nd         | nd   | 0.56  | nd   | 1.47  | 116.10 | nd       |
| W43K-7d   | nd         | nd   | nd    | 1.17 | 18.29 | 177.81 | nd       |
| W15K-7d   | nd         | nd   | nd    | nd   | nd    | 174.71 | nd       |
| W42K-7d   | nd         | nd   | 4.96  | nd   | 3.71  | 182.51 | nd       |
| W45K-7d   | nd         | nd   | nd    | 1.65 | 7.74  | 268.24 | nd       |
| W36K-7d   | nd         | 2.77 | nd    | nd   | 8.22  | 110.28 | nd       |
| W46K-7d   | nd         | nd   | 9.20  | nd   | 3.04  | 139.44 | nd       |
| W29K-7d   | nd         | nd   | nd    | 1.75 | nd    | 47.86  | nd       |
| W20K-7d   | nd         | 1.10 | 8.66  | nd   | 1.23  | 156.04 | nd       |
| W32K-7d   | nd         | 0.55 | nd    | nd   | nd    | 99.89  | nd       |
| W25K-7d   | nd         | nd   | nd    | 0.81 | 5.60  | 148.21 | nd       |
| W28-2K-7d | nd         | 2.83 | nd    | nd   | nd    | 111.98 | nd       |
| W8K-7d    | nd         | 2.09 | nd    | 1.17 | 19.83 | 61.50  | nd       |
